# Supplementary material
Source: publisher figshare collection journal article supplement (https://sage.figshare.com/ndownloader/files/12370511)
Supplement: Supplementary file 1 [file 12370511]

**Supplemental File 1. TPOC Review Instrument**

| <b>Domain</b>             | <b>Review Criteria</b>                                                                                                                                                                                                                  | <b>Fidelity<br/>(0,1)</b> |
|---------------------------|-----------------------------------------------------------------------------------------------------------------------------------------------------------------------------------------------------------------------------------------|---------------------------|
| Main problem              | <ul style="list-style-type: none"> <li>• Identifies correct diagnosis</li> <li>• No jargon or abbreviations</li> </ul>                                                                                                                  |                           |
| Signs of worsening health | <ul style="list-style-type: none"> <li>• Identifies signs of acute health problems associated with the diagnosis</li> <li>• No jargon or abbreviations</li> </ul>                                                                       |                           |
| Emergency Contact         | <ul style="list-style-type: none"> <li>• Identifies a person that should be contacted in an emergency (caregiver or professional)</li> <li>• Provides a telephone number</li> </ul>                                                     |                           |
| Medications               | <ul style="list-style-type: none"> <li>• Identifies new, changed or high risk medications.</li> <li>• Provides instructions to minimize risk from using the medications</li> <li>• No jargon or abbreviations</li> </ul>                |                           |
| Medical treatments        | <ul style="list-style-type: none"> <li>• Identifies new or changed high risk or high priority treatments at home</li> <li>• Provides instructions to minimize risk from the treatments</li> <li>• No jargon or abbreviations</li> </ul> |                           |
| Discharge destination     | <ul style="list-style-type: none"> <li>• Identifies the location where the patient will reside after discharge</li> <li>• Identifies whether the patient will live alone, or with others (with name and relationship)</li> </ul>        |                           |
| Mobility                  | <ul style="list-style-type: none"> <li>• Identifies new or high priority strategies to promote mobility or prevent falls at home.</li> <li>• No jargon or abbreviations</li> </ul>                                                      |                           |
| Self-care                 | <ul style="list-style-type: none"> <li>• Identifies new or high priority strategies to promote independence or promote self-care at home.</li> <li>• No jargon or abbreviations</li> </ul>                                              |                           |
| Advanced care planning    | <ul style="list-style-type: none"> <li>• Identifies advanced care plans or referrals for obtaining these, if desired by the patient.</li> </ul>                                                                                         |                           |
| Home Health Services      | <ul style="list-style-type: none"> <li>• Identifies the provider of home health services</li> <li>• Identifies the provider's telephone number</li> </ul>                                                                               |                           |
| Appointments              | <ul style="list-style-type: none"> <li>• Identifies the clinicians' names, dates of appointments, and telephone numbers</li> </ul>                                                                                                      |                           |
| Labs/Studies              | <ul style="list-style-type: none"> <li>• Identifies the type of pending study or lab</li> <li>• Identifies the date, time and location of any follow-up studies or labs</li> </ul>                                                      |                           |
